# Supplementary material for: Functionalized chiral ionic liquid as recyclable organocatalyst for asymmetric Michael addition to nitrostyrenes
Source: Royal Society of Chemistry journal article supplement (doi:10.1039/b702081c), 2007-01-01
Supplement: b702081c.pdf [file b702081c.pdf]

Supplementary Material (ESI) for Green Chemistry  
This journal is © The Royal Society of Chemistry 2007

**Functionalized Chiral Ionic Liquid as Efficient Organocatalyst for  
Asymmetric Michael Addition to Nitroalkenes**

Bukuo Ni, Qianying Zhang, and Allan D. Headley\*

Department of Chemistry, Texas A&M University-Commerce

Commerce, TX 75429-3001, USA

E-mail: [allan\\_headley@tamu-commerce.edu](mailto:allan_headley@tamu-commerce.edu)

**Experimental section:**

**(1) Synthesis of compound 1**

To a solution of N-Boc-(S)-2-aminomethylpyrrolidine (1.00g, 5.0 mmol) in CH<sub>2</sub>Cl<sub>2</sub> (20 mL) was added Et<sub>3</sub>N (0.7 mL, 5.5 mmol), the solution was cooled to 0°C and 3-Chloropropanesulfonyl chloride (0.89 g, 5.0 mmol) was added. After addition, the reaction mixture was warmed up to stir at room temperature for 17 h, diluted with CH<sub>2</sub>Cl<sub>2</sub> (60 mL) and washed with 0.5 M HCl (15 mL), saturated aqueous NaHCO<sub>3</sub> (15 mL), and brine (15 mL). The organic phase was dried with Na<sub>2</sub>SO<sub>4</sub> and purified by flash chromatography on silica gel (hexane : ethyl acetate = 2 : 1) to afford the product **1** (1.22 g, 72%).  $[\alpha]_D^{20} = -24.4^\circ$  (c = 0.55, CH<sub>2</sub>Cl<sub>2</sub>); <sup>1</sup>H NMR (300 MHz, CDCl<sub>3</sub>) δ 6.33-6.18 (br, 1H), 4.02-3.85 (br, 1H), 3.66 (t, *J* = 6.0 Hz, 2H), 3.50-3.05 (m, 6H), 2.35-2.20 (m, 2H), 2.08-1.97 (m, 1H), 1.92-1.76 (m, 2H), 1.74-1.62 (m, 1H), 1.44 (s, 9H); <sup>13</sup>C NMR (75

MHz, CDCl<sub>3</sub>) δ 156.5, 80.4, 57.0, 49.1, 48.5, 47.3, 42.9, 29.5, 28.4, 26.9, 23.8; IR (neat)  $\nu = 2976, 1670, 1397, 1148, 1111 \text{ cm}^{-1}$ ; HRMS (ESI)  $m/z$  (%) Calcd for C<sub>13</sub>H<sub>26</sub>ClN<sub>2</sub>O<sub>4</sub>S (MH<sup>+</sup>): 341.1296, Found: 341.1286.

## (2) Synthesis of compound 2

To a solution of compound **1** (1.22g, 3.58 mmol) in acetone (15 mL) was added NaI (5.3 g, 35.3 mmol) under N<sub>2</sub>. The reaction mixture was stirred at reflux for 24 h, removed the solvent, diluted with CH<sub>2</sub>Cl<sub>2</sub> (60 mL), washed with water and brine. The organic phase was dried over Na<sub>2</sub>SO<sub>4</sub>, filtrated and concentrated to give the crude iodine product (1.45 g, 96%), which was used for the next step directly without further characterization.

The above iodine compound (1.45 g, 3.36 mmol) and 1-methylimidazole (0.30 g, 3.69 mmol) were dissolved in CH<sub>3</sub>CN ( 2 mL) and the solution was stirred for 14 h at 65°C, at which time the solvent was evaporated under reduced pressure. The residue was washed with Et<sub>2</sub>O (2 x 5 mL) and dried to give the compound **2** (1.55 g, 90%). <sup>1</sup>H NMR (300 MHz, CD<sub>3</sub>OD) δ 9.01 (s, 1H), 7.69 (d,  $J = 1.6 \text{ Hz}$ , 1H), 7.59 (d,  $J = 1.6 \text{ Hz}$ , 1H), 4.43 (t,  $J = 7.2 \text{ Hz}$ , 2H), 3.94 (s, 3H), 3.87-3.79 (m, 1H); 3.37-3.23 (m, 3H), 3.15 (t,  $J = 7.2 \text{ Hz}$ , 2H), 3.11-3.02 (m, 1H), 2.36 (dt,  $J = 14.4 \text{ and } 7.2 \text{ Hz}$ , 2H), 2.00-1.77 (m, 4H), 1.45 (s, 9H); <sup>13</sup>C NMR (75 MHz, CD<sub>3</sub>OD) δ 156.7, 156.3, 138.0, 125.2, 123.6, 81.2, 80.9, 58.8, 58.5, 45.9, 36.9, 29.6, 29.2, 28.8, 25.9, 24.4, 23.6. This compound was used for the next step without further characterization.

## (3) Synthesis of compound 3

The compound **2** (1.55 g, 3.02 mmol) was dissolved in a 1 : 1 mixture of trifluoroacetic acid and dichloromethane (10 mL) and the solution was stirred for 2 h at rt, at which time the solvent was evaporated under reduced pressure. The pH was adjusted to 8 with

aqueous NaHCO<sub>3</sub> and LiNTf<sub>2</sub> (0.87 g, 3.02 mmol) was added and the mixture was stirred for 1 h at rt, extracted with CH<sub>2</sub>Cl<sub>2</sub> (3 x 20 mL) and the organic phase was dried over NaSO<sub>4</sub> and purified by flash chromatography on silica gel (CH<sub>2</sub>Cl<sub>2</sub> : MeOH = 10 : 1) to afford the product **3** (1.51 g, 88% for 2 steps).  $[\alpha]_{\text{D}}^{20} = +0.42^{\circ}$  (c = 0.71, MeOH); <sup>1</sup>H NMR (300 MHz, CD<sub>3</sub>OD)  $\delta$  8.85 (s, 1H), 7.62 (t, *J* = 1.6 Hz, 1H), 7.57 (t, *J* = 1.6 Hz, 1H), 4.40 (t, *J* = 7.2 Hz, 2H), 3.93 (s, 3H), 3.72-3.65 (m, 1H); 3.45 (dd, *J* = 15.2 and 4.4 Hz, 1H), 3.40-3.25 (m, 3H), 3.21 (t, *J* = 7.2 Hz, 2H), 2.38 (dt, *J* = 14.4 and 7.2 Hz, 2H), 2.23-2.00 (m, 3H), 1.80-1.70 (m, 1H); <sup>13</sup>C NMR (75 MHz, CD<sub>3</sub>OD)  $\delta$  138.1, 125.3, 123.6, 121.2 (*q*, *J* = 319.2 Hz, 2C), 62.0, 46.6, 44.6, 44.3, 36.6, 28.1, 25.6, 23.9; IR (neat)  $\nu$  = 1568, 1347, 1187, 1133, 1056 cm<sup>-1</sup>; HRMS (ESI +) *m/z* (%) Calcd for [C<sub>12</sub>H<sub>23</sub>N<sub>4</sub>OS]<sup>+</sup>: 287.1542, Found: 287.1536; HRMS (ESI -) *m/z* (%) Calcd for [N(SO<sub>2</sub>CF<sub>3</sub>)<sub>2</sub>]<sup>-</sup>: 279.9173, Found: 279.9202.

**(4) (R)-2-[(S)-2-Nitro-1-phenylethyl]hexanal 4b:**<sup>1</sup>  $[\alpha]_{\text{D}}^{20} = -5.5^{\circ}$  (c = 0.22 in CH<sub>2</sub>Cl<sub>2</sub>); <sup>1</sup>H NMR (300 MHz, CDCl<sub>3</sub>)  $\delta$  9.69 (d, *J* = 2.8 Hz, 1H), 7.38-7.15 (m, 5H), 4.73-4.62 (m, 2H), 3.78 (dt, *J* = 9.6 and 5.2 Hz, 1H), 2.73-2.67 (m, 1H), 1.53-1.11 (m, 6H), 0.78 (t, *J* = 6.8 Hz, 3H); <sup>13</sup>C NMR (75 MHz, CDCl<sub>3</sub>)  $\delta$  203.2, 136.8, 129.1, 128.1, 128.0, 78.4, 53.9, 43.1, 28.5, 27.0, 22.4, 13.6; HPLC (Chiralcel OD-H, i-Propanol/Hexane = 15/85, flow rate 1 mL/min,  $\lambda$  = 254 nm): *t*<sub>minor</sub> = 12.8 min, *t*<sub>major</sub> = 16.0 min; ee = 68%.

**(5) (R)-2-[(S)-1-(4-Methylphenyl)-2-Nitroethyl]hexanal 4c:**  $[\alpha]_{\text{D}}^{20} = +53.9^{\circ}$  (c = 0.18 in CH<sub>2</sub>Cl<sub>2</sub>); <sup>1</sup>H NMR (300 MHz, CDCl<sub>3</sub>)  $\delta$  9.70 (d, *J* = 2.8 Hz, 1H), 7.14 (d, *J* = 8.0 Hz, 2H), 7.05 (d, *J* = 8.0 Hz, 2H), 4.72-4.58 (m, 2H), 3.73 (dt, *J* = 9.6 and 5.2 Hz, 1H), 2.71-2.63 (m, 1H), 2.32 (s, 3H), 1.53-1.08 (m, 6), 0.79 (t, *J* = 7.2 Hz, 3H); <sup>13</sup>C NMR (75 MHz, CDCl<sub>3</sub>)  $\delta$  203.4, 137.8, 133.6, 129.7, 127.8, 78.5, 53.9, 42.8, 28.5, 27.0, 22.5, 21.0,

13.6; IR (neat)  $\nu = 2932, 1723, 1554, 1379, 1117 \text{ cm}^{-1}$ ; HRMS (ESI)  $m/z$  (%) Calcd for  $\text{C}_{15}\text{H}_{22}\text{NO}_3$  ( $\text{MH}^+$ ): 264.1594, Found: 264.1584; HPLC (Chiralcel OD-H, i-Propanol/Hexane = 20/80, flow rate 1 mL/min,  $\lambda = 254 \text{ nm}$ ):  $t_{\text{minor}} = 9.7 \text{ min}$ ,  $t_{\text{major}} = 11.3 \text{ min}$ ; ee = 67%.

**(6) (R)-2-[(S)-1-(4-Methoxyphenyl)-2-Nitroethyl]pentanal 4d:**<sup>1</sup>  $[\alpha]_{\text{D}}^{20} = +29.2^\circ$  (c = 0.12 in  $\text{CH}_2\text{Cl}_2$ );  $^1\text{H NMR}$  (300 MHz,  $\text{CDCl}_3$ )  $\delta$  9.70 (d,  $J = 2.8 \text{ Hz}$ , 1H), 7.08 (d,  $J = 8.8 \text{ Hz}$ , 2H), 6.87 (d,  $J = 8.8 \text{ Hz}$ , 2H), 4.70-4.55 (m, 2H), 3.80-3.69 (m, 1H), 2.70-2.60 (m, 1H), 1.60-1.10 (m, 4H), 0.81 (t,  $J = 7.6 \text{ Hz}$ , 3H);  $^{13}\text{C NMR}$  (75 MHz,  $\text{CDCl}_3$ )  $\delta$  203.4, 159.3, 129.0, 128.5, 114.5, 78.6, 55.2, 54.0, 42.5, 29.4, 19.8, 13.9; HPLC (Chiralcel OD-H, i-Propanol/Hexane = 10/90, flow rate 1 mL/min,  $\lambda = 254 \text{ nm}$ ):  $t_{\text{minor}} = 20.5 \text{ min}$ ,  $t_{\text{major}} = 22.4 \text{ min}$ ; ee = 67%.

**(7) (2R, 3S)-2-(methylethyl)-4-nitro-3-phenylbutanal 4e:**<sup>2</sup>  $[\alpha]_{\text{D}}^{20} = +32.7^\circ$  (c = 0.15 in  $\text{CH}_2\text{Cl}_2$ );  $^1\text{H NMR}$  (300 MHz,  $\text{CDCl}_3$ )  $\delta$  9.93 (d,  $J = 2.4 \text{ Hz}$ , 1H), 7.40-7.13 (m, 5H), 4.70-4.53 (m, 2H), 3.90 (dt,  $J = 10.4$  and  $4.4 \text{ Hz}$ , 1H), 2.80-2.73 (m, 1H), 1.75-1.67 (m, 1H), 1.10 (d,  $J = 7.2 \text{ Hz}$ , 3H), 0.89 (d,  $J = 7.2 \text{ Hz}$ , 3H);  $^{13}\text{C NMR}$  (75 MHz,  $\text{CDCl}_3$ )  $\delta$  204.3, 137.1, 129.1, 128.1, 127.9, 79.0, 58.8, 41.9, 27.9, 21.6, 17.0; HPLC (Chiralpak AS-H, i-Propanol/Hexane = 5/95, flow rate 0.5 mL/min,  $\lambda = 254 \text{ nm}$ ):  $t_{\text{minor}} = 30.3 \text{ min}$ ,  $t_{\text{major}} = 31.8 \text{ min}$ ; ee = 66%.

**(8) (2R, 3S)-2-(methylethyl)-4-nitro-3-(4-methylphenyl)butanal 4f:**  $[\alpha]_{\text{D}}^{20} = +39.2^\circ$  (c = 0.25 in  $\text{CH}_2\text{Cl}_2$ );  $^1\text{H NMR}$  (300 MHz,  $\text{CDCl}_3$ )  $\delta$  9.92 (d,  $J = 2.4 \text{ Hz}$ , 1H), 7.14 (d,  $J = 7.6 \text{ Hz}$ , 2H), 7.07 (d,  $J = 7.6 \text{ Hz}$ , 2H); 4.64 (dd,  $J = 12.8$  and  $4.0 \text{ Hz}$ , 1H), 4.54 (d,  $J = 12.0$  and  $9.6 \text{ Hz}$ , 1H), 3.86 (dt,  $J = 10.0$  and  $4.4 \text{ Hz}$ , 1H), 2.73 (ddd,  $J = 10.8, 4.4,$  and  $2.8 \text{ Hz}$ , 1H), 1.78-1.68 (m, 1H), 1.09 (d,  $J = 7.2 \text{ Hz}$ , 3H), 0.88 (d,  $J = 7.2 \text{ Hz}$ , 3H);  $^{13}\text{C NMR}$  (75

MHz, CDCl<sub>3</sub>) δ 204.5, 137.8, 133.9, 129.8, 127.8, 79.1, 58.8, 41.6, 27.8, 21.6, 21.0, 16.9;  
IR (neat) ν = 2915, 1730, 1718, 1552, 1179 cm<sup>-1</sup>; HRMS (ESI) m/z (%) Calcd for  
C<sub>14</sub>H<sub>20</sub>NO<sub>3</sub> (MH<sup>+</sup>): 250.1438, Found: 250.1443; HPLC (Chiralcel OD-H, i-  
Propanol/Hexane = 5/95, flow rate 0.5 mL/min, λ = 254 nm): t<sub>minor</sub> = 30.5 min, t<sub>major</sub> =  
32.2 min; ee = 73%.

**(9) (R)-2-[(S)-2-Nitro-1-phenylethyl]pentanal 4g:**<sup>1</sup> [α]<sub>D</sub><sup>20</sup> = -13.3° (c = 0.15 in  
CH<sub>2</sub>Cl<sub>2</sub>); <sup>1</sup>H NMR (300 MHz, CDCl<sub>3</sub>) δ 9.70 (d, J = 2.8 Hz, 1H), 7.38-7.15 (m, 5H),  
4.75-4.61 (m, 2H), 3.77 (dt, J = 9.6 and 4.2 Hz, 1H), 2.75-2.67 (m, 1H), 1.53-1.10 (m,  
4H), 0.80 (t, J = 6.8 Hz, 3H); <sup>13</sup>C NMR (75 MHz, CDCl<sub>3</sub>) δ 203.2, 137.8, 129.1, 128.2,  
128.1, 128.0, 78.4, 53.8, 43.2, 29.5, 19.8, 13.9; HPLC (Chiralcel OD-H, i-  
Propanol/Hexane = 20/80, flow rate 1 mL/min, λ = 254 nm): t<sub>minor</sub> = 11.9 min, t<sub>major</sub> =  
15.5 min; ee = 64%.

**(10) (R)-2-[(S)-1-(4-Methylphenyl)-2-Nitroethyl]pentanal 4h:** [α]<sub>D</sub><sup>20</sup> = +41.8° (c =  
0.11 in CH<sub>2</sub>Cl<sub>2</sub>); <sup>1</sup>H NMR (300 MHz, CDCl<sub>3</sub>) δ 9.69 (d, J = 2.8 Hz, 1H), 7.14 (d, J = 8.0  
Hz, 2H), 7.05 (d, J = 8.0 Hz, 2H); 4.68 (dd, J = 12.8 and 5.6 Hz, 1H), 4.61 (d, J = 12.8  
and 9.6 Hz, 1H), 3.73 (dt, J = 9.6 and 5.2 Hz, 1H), 2.70-2.64 (m, 1H), 2.33 (s, 3H), 1.60-  
1.10 (m, 4H), 0.81 (d, J = 7.2 Hz, 3H); <sup>13</sup>C NMR (75 MHz, CDCl<sub>3</sub>) δ 203.4, 137.9,  
133.6, 129.8, 127.8, 78.5, 53.9, 42.9, 29.4, 21.1, 19.8, 13.9; IR (neat) ν = 1722, 1553,  
1515, 1379, 817 cm<sup>-1</sup>; HRMS (ESI) m/z (%) Calcd for C<sub>14</sub>H<sub>20</sub>NO<sub>3</sub> (MH<sup>+</sup>): 250.1438,  
Found: 250.1426; HPLC (Chiralcel OD-H, i-Propanol/Hexane = 20/80, flow rate 1  
mL/min, λ = 254 nm): t<sub>minor</sub> = 10.4 min, t<sub>major</sub> = 12.6 min; ee = 68%.

**(11) (S)-2-((R)-2-nitro-1-phenylethyl)cyclohexanone 4i:**<sup>3</sup> [α]<sub>D</sub><sup>20</sup> = -28° (c = 0.05 in  
CH<sub>2</sub>Cl<sub>2</sub>); <sup>1</sup>H NMR (300 MHz, CDCl<sub>3</sub>) δ 7.34-7.23 (m, 3H), 7.17 (d, J = 6.8 Hz, 2H), 4.94

(dd,  $J = 12.4$  and  $4.4$  Hz, 1H), 4.63 (dd,  $J = 12.4$  and  $10.0$  Hz, 1H), 3.76 (dt,  $J = 10.0$  and  $4.8$  Hz, 1H), 2.72-2.65 (m, 1H), 2.52-2.34 (m, 2H), 2.13-2.04 (m, 1H), 1.83-1.50 (m, 4H), 1.30-1.18 (m, 1H); HPLC (Chiralpak AS-H, i-Propanol/Hexane = 10/90, flow rate 0.7 mL/min,  $\lambda = 238$  nm):  $t_{\text{minor}} = 22.8$  min,  $t_{\text{major}} = 34.5$  min; ee = 88%.

**References:**

1. Wang, W.; Wang, J.; Li, H. *Angew. Chem.. Int. Ed.* **2005**, *44*, 1369.
2. Hayashi, Y.; Gotoh, H.; Hayashi, T.; Shoji, M. *Angew. Chem.. Int. Ed.* **2005**, *44*, 4212.
3. Cao, C-L.; Ye, M-C.; Sun, X-L.; Tang, Y. *Org. Lett.* **2006**, *8*, 2901.
